# Supplementary material for: Efficient Fenton-like La–Cu–O/SBA-15 catalyst for the degradation of organic dyes under ambient conditions
Source: Royal Society of Chemistry journal article supplement (doi:10.1039/c4ra00917g), 2014-01-01
Supplement: c4ra00917g1.pdf [file c4ra00917g1.pdf]

## Efficient Fenton-like La-Cu-O/SBA-15 catalyst for the degradation of organic dyes under ambient conditions

Ping Xiao, Hailong Li, Tao Wang, Xuelian Xu, Jinlin Li, Junjiang Zhu

Key Laboratory of Catalysis and Materials Science of the State Ethnic Affairs Commission & Ministry of Education, South-central University for Nationalities, No. 708 Minyuan Road, Wuhan 430074, Hubei, China

### Table of contents

#### Experimental Section

**Table S1.** Degradation of RhB over different perovskite-type catalysts under various conditions.

**Figure S1.** (A) Wide-angle XRD patterns for La<sub>2</sub>CuO<sub>4</sub>/SBA-15, CuO/SBA-15 and La-Cu-O/SBA-15; (B) N<sub>2</sub> physisorption isotherms of bulk La-Cu-O; (C) TEM image for pure SBA-15; (D) TEM image for bulk La-Cu-O.

**Figure S2.** (A) Wide-angle XRD, (B) Small-angle XRD, (C) XPS, (D) FT-IR, (E) TGA, and (F) N<sub>2</sub> physisorption isotherms for the fresh and used La-Cu-O/SBA-15 catalysts.

**Figure S3.** N<sub>2</sub> physisorption isotherms and (insert) the corresponding pore size distribution for SBA-15.

**Figure S4.** TEM images for the fresh (the upper two) and used (the bottom two) La-Cu-O/SBA-15.

**Figure S5.** Conversion of RhB measured in the normal reaction and that in the filtered reaction. For the filtered reaction, the catalyst was filtered after reaction for 30 min.

**Figure S6.** Degradation activity of La-Cu-O/SBA-15 for RhB oxidation at molar ratio of RhB to catalyst (La-Cu-O/SBA-15) equals to 0.0045, 0.022 and 0.077.

**Figure S7.** Effect of H<sub>2</sub>O<sub>2</sub> dosage on the degradation activity of La-Cu-O/SBA-15 for RhB oxidation. Data measured at reaction time of 30 min; molar ratio of RhB to catalyst (La-Cu-O/SBA-15) is 0.022.

**Figure S8.** Degradation activity of La-Cu-O/SBA-15, La<sub>2</sub>CuO<sub>4</sub>/SBA-15, CuO/SBA-15 and the mixture “La-Cu-O + SBA-15” for RhB oxidation with the reaction time. Molar ratio of RhB to catalyst (La-Cu-O/SBA-15) is 0.077.

**Figure S9.** Catalytic activity of La-Cu-O/SBA-15 for various organic dyes. Reaction conditions: catalyst 0.1 g, reaction time 30 min, dyes amount 50 mL, 0.02 mmol/L.

**Figure S10.** Effect of pH on the degradation activity La-Cu-O/SBA-15 for RhB oxidation, data were taken at reaction time of 30 and 120 min. Molar ratio of RhB to catalyst (La-Cu-O/SBA-15) is 0.022.

**Figure S11.** Changes of solution pH during the reaction at different initial pH values. Molar ratio of RhB to catalyst (La-Cu-O/SBA-15) is 0.022.

**Figure S12.** HPLC-MS analysis on the RhB solution before and after reaction for 60 min. Molar ratio of RhB to catalyst (La-Cu-O/SBA-15) is 0.077.

## Experimental

### *Preparation of catalyst*

La-Cu-O/SBA-15 was prepared by impregnation method. Briefly,  $\text{La}(\text{NO}_3)_3 \cdot n\text{H}_2\text{O}$  (0.01mol),  $\text{Cu}(\text{NO}_3)_2 \cdot 9\text{H}_2\text{O}$  (0.01mol), citric acid (0.024mol), de-ionized water (10mL) and ethanol (20mL) were first mixed, and to this solution 2 g of pre-prepared SBA-15[1] was added. The resulting slurry was stirred and heated to 70 °C until it became gel status. The gel was then dried at 100 °C, calcined at 500 °C for 4 h and then at 700 °C for another 4 h in air atmosphere, with a heating rate of 2 °C/min at each temperature-rise stage (RT→500 °C, 500→700 °C). *The initial purpose of this procedure is to synthesize a SBA-15 supported  $\text{LaCuO}_3$  sample, but later we found, from the XRD patterns, that the oxides produced is not in  $\text{LaCuO}_3$  phase, but contains a mixture of  $\text{La}_2\text{CuO}_4$  and  $\text{CuO}$  phase.* Therefore, this sample was defined as La-Cu-O/SBA-15 for simplicity.

The synthesis of  $\text{La}_2\text{CuO}_4/\text{SBA-15}$  and  $\text{CuO}/\text{SBA-15}$  was similar to that of La-Cu-O/SBA-15 except that the dosage of metal nitrates and citric acid was used according to the stoichiometric ratio of  $\text{La}_2\text{CuO}_4$  and  $\text{CuO}$ . The loading of Cu-containing compounds was kept to be 55.6%, 67.0% and 28.6% in weight for La-Cu-O/SBA-15,  $\text{La}_2\text{CuO}_4/\text{SBA-15}$  and  $\text{CuO}/\text{SBA-15}$ , in order to maintain the same copper content in each sample. Bulk La-Cu-O was prepared as that of La-Cu-O/SBA-15 except the use of SBA-15.

### *Characterizations.*

X-Ray diffraction (XRD) patterns were collected using a Bruker D8 Advance X-ray diffractometer (Cu  $K\alpha$  irradiation). The  $2\theta$  angle ranged from 0.5° to 5° and 10° to 80° for the small-angle and wide-angle measurements, respectively.  $\text{N}_2$  physisorption isotherms were determined at liquid-nitrogen temperature (-196 °C) with an Autosorb-1 apparatus. The sample was degassed at 150 °C overnight before measurement. Transmission electron microscopy (TEM) images were obtained on a Tecnai G<sup>2</sup> 20 S-Twin apparatus with high-resolution transmission electron microscope. Copper grids were used to load the samples for analysis. Thermal gravimetric analysis (TGA) was performed on a NETZSCH TG 209F3 equipment at a heating rate of 5 °C min<sup>-1</sup> in oxygen using  $\text{Al}_2\text{O}_3$  crucibles.

$\text{CO}_2$  produced from RhB degradation was measured as below. The saturated La-Cu-O/SBA-15 (0.1g) was added to a one-neck round bottom flask (50 mL) filled with 50 mL of RhB solution (1 mmol/L). The neck was equipped with a soap film flow meter. After stirring for 30 min (stirring rate of 600 rpm), 1 mL  $\text{H}_2\text{O}_2$  (30%, w/w) was added to

the solution to start the catalytic test. The amount of CO<sub>2</sub> produced at different reaction time was evaluated by calculating the volume of the film moved.

### *Catalytic tests*

An adsorption procedure was conducted before the catalytic test, in order to exclude that the decrease in the concentration is not attributed to the adsorption of RhB on the catalyst. For this purpose, 0.1 g La-Cu-O/SBA-15 powder was first added to 50 mL RhB solution (0.02 mmol/L) and adsorption procedures were conducted until reaching adsorption/desorption equilibrium (i.e., no change in the absorbance with the adsorption time). The saturated catalyst was then filtered and put into a fresh RhB solution (50 mL, 0.02 mmol/L). After stirring for 30 min (stirring rate of 600 rpm), 1 mL H<sub>2</sub>O<sub>2</sub> (30%, w/w) was added to the solution to start the catalytic test. 4 mL aliquots were collected by filtration at a desired reaction time and the absorbance was measured by a spectrophotometer (Model: 722E, Shanghai Spectrum Instruments, China) at wavelength of 550 nm. Both the adsorption and catalytic tests were conducted at room temperature. The concentration of RhB before and after reaction was calibrated using a standard concentration vs. absorbance curve made by an external standard method. The activity was calculated as: % conversion =  $(C_0 - C_A) / C_0 * 100$ , where  $C_0$  and  $C_A$  represent the concentration of RhB before and after reaction, respectively.

After the oxidation reaction, the catalysts were filtered, dried in an oven at 100 °C for several hours, and put to a new batch of RhB solution to start the second cycle. This time the sample also underwent an adsorption procedure as the fresh one. The amount of catalyst in each run was balanced to 0.1 g by adding few amounts of used catalysts that were obtained from parallel experiments. This procedure was repeated five times to study the reusability of La-Cu-O/SBA-15.

In evaluating the catalytic efficiency of the catalyst, we referred to the reaction rate, which was calculated as: mol of RhB converted per hour and per total mol of copper.

**Table S1.** Degradation of RhB over different perovskite-type catalysts under various conditions.

| Catalyst                                             | H <sub>2</sub> O <sub>2</sub> : Catalyst: RhB <sup>[a]</sup> | Reaction Rate (h <sup>-1</sup> , ×10 <sup>-3</sup> ) <sup>[b]</sup> | Reference | Remark <sup>[c]</sup>             |
|------------------------------------------------------|--------------------------------------------------------------|---------------------------------------------------------------------|-----------|-----------------------------------|
| LaFeO <sub>3</sub>                                   | 0 : 206 : 1                                                  | 5.37                                                                | [2]       | Vis                               |
| porous SrTiO <sub>3</sub>                            | 0 : 272 : 1                                                  | 7.34                                                                | [3]       | UV                                |
| BiFeO <sub>3</sub>                                   | 100 : 639 : 1                                                | 0.91                                                                | [4]       | Vis-H <sub>2</sub> O <sub>2</sub> |
| BiFeO <sub>3</sub>                                   | 1000 : 160 : 1                                               | 6.63                                                                | [5]       | H <sub>2</sub> O <sub>2</sub>     |
| LaTi <sub>0.4</sub> Cu <sub>0.6</sub> O <sub>3</sub> | 2000 : 573 : 1                                               | 2.30                                                                | [6]       | H <sub>2</sub> O <sub>2</sub>     |
| LaFeO <sub>3</sub> /SBA-15                           | 9910 : 227 : 1                                               | 5.38                                                                | [7]       | H <sub>2</sub> O <sub>2</sub>     |
| La-Cu-O/SBA-15                                       | 9910 : 224 : 1                                               | 8.95                                                                | This work | H <sub>2</sub> O <sub>2</sub>     |
|                                                      | 198 : 13 : 1                                                 | 109.48                                                              | This work | H <sub>2</sub> O <sub>2</sub>     |

<sup>[a]</sup> Molar ratio of H<sub>2</sub>O<sub>2</sub>: Catalyst: RhB; <sup>[b]</sup> The value was measured at reaction time of 30 min.; <sup>[c]</sup> Reaction conditions used in the catalytic system

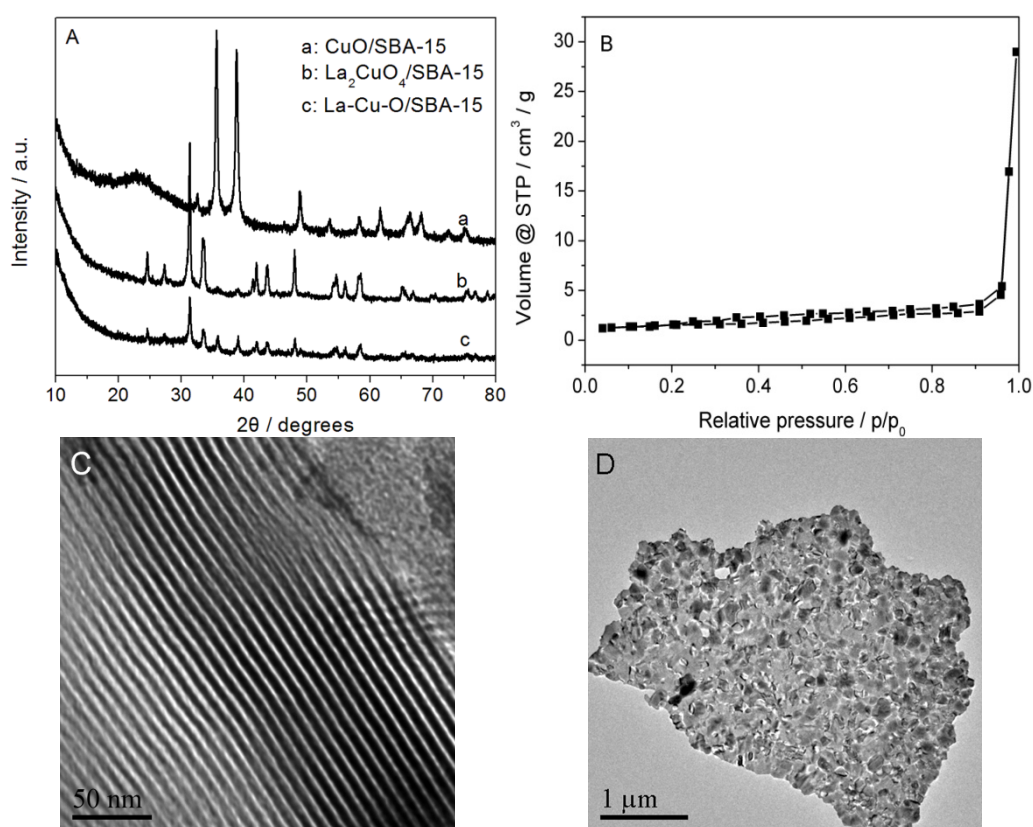

**Figure S1.** (A) Wide-angle XRD patterns for La<sub>2</sub>CuO<sub>4</sub>/SBA-15, CuO/SBA-15 and La-Cu-O/SBA-15; (B) N<sub>2</sub> physisorption isotherms of bulk La-Cu-O; (C) TEM image for pure SBA-15; (D) TEM image for bulk La-Cu-O.

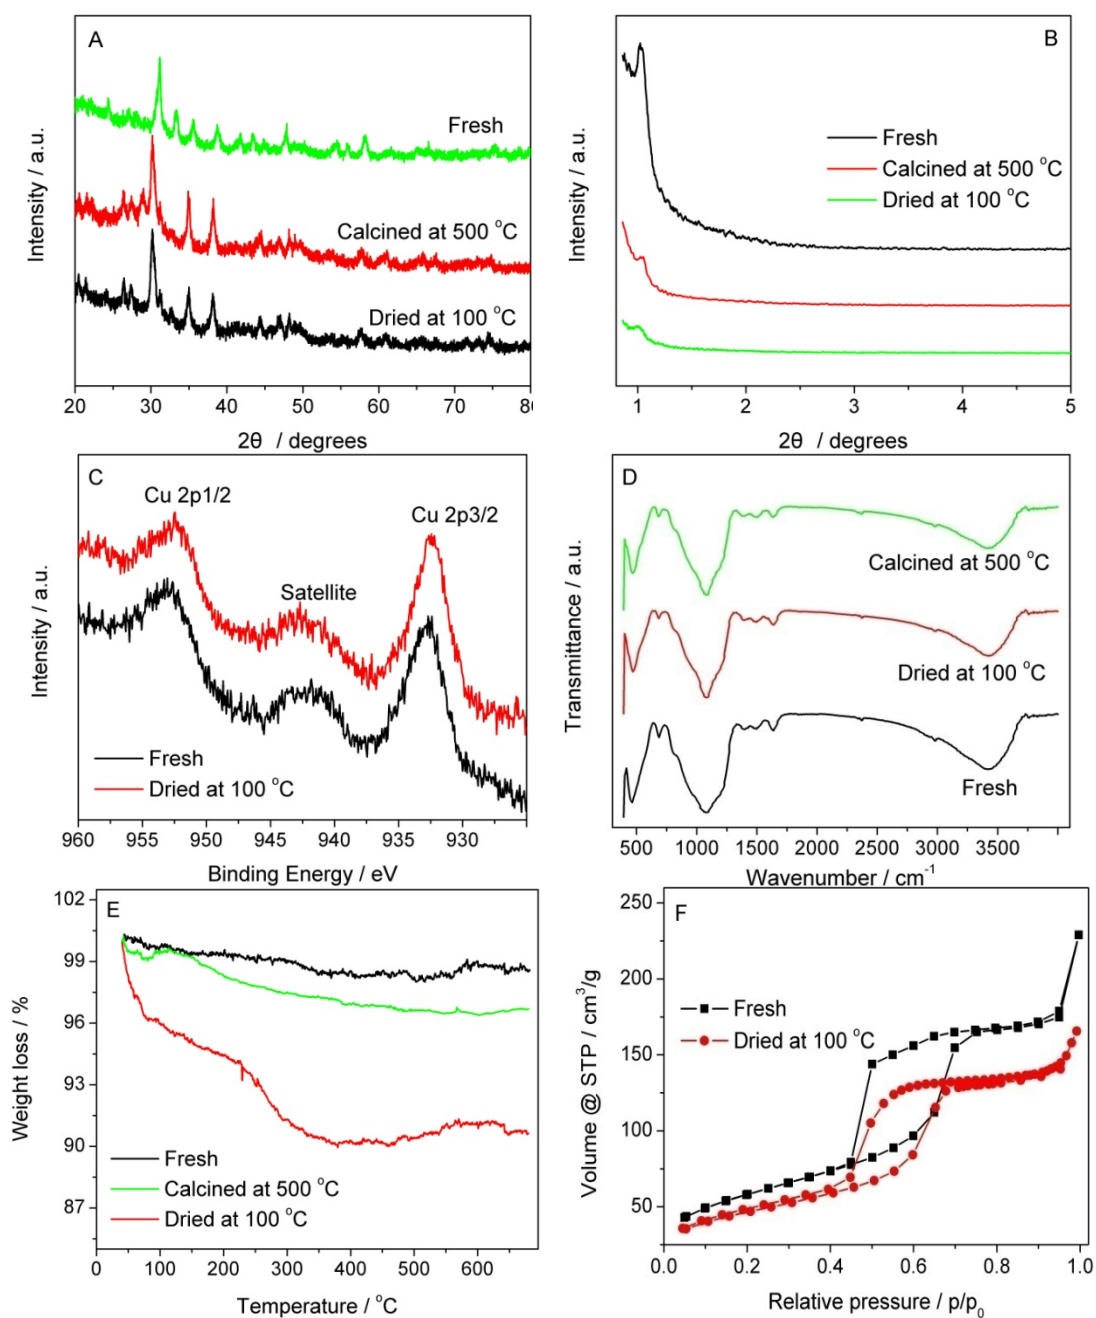

**Figure S2.** (A) Wide-angle XRD, (B) Small-angle XRD, (C) XPS, (D) FT-IR, (E) TGA, and (F) N<sub>2</sub> physisorption isotherms for the fresh and used La-Cu-O/SBA-15 catalysts. “Dried at 100 °C” means the used sample was filtered and dried in air at 100 °C; “Calcined at 500 °C” means the dried sample was further calcined in air at 500 °C for 2 h.

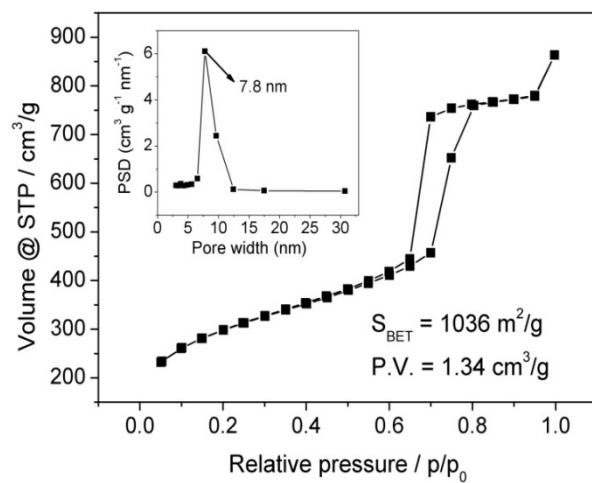

**Figure S3.**  $N_2$  physisorption isotherms and (insert) the corresponding pore size distribution for SBA-15.

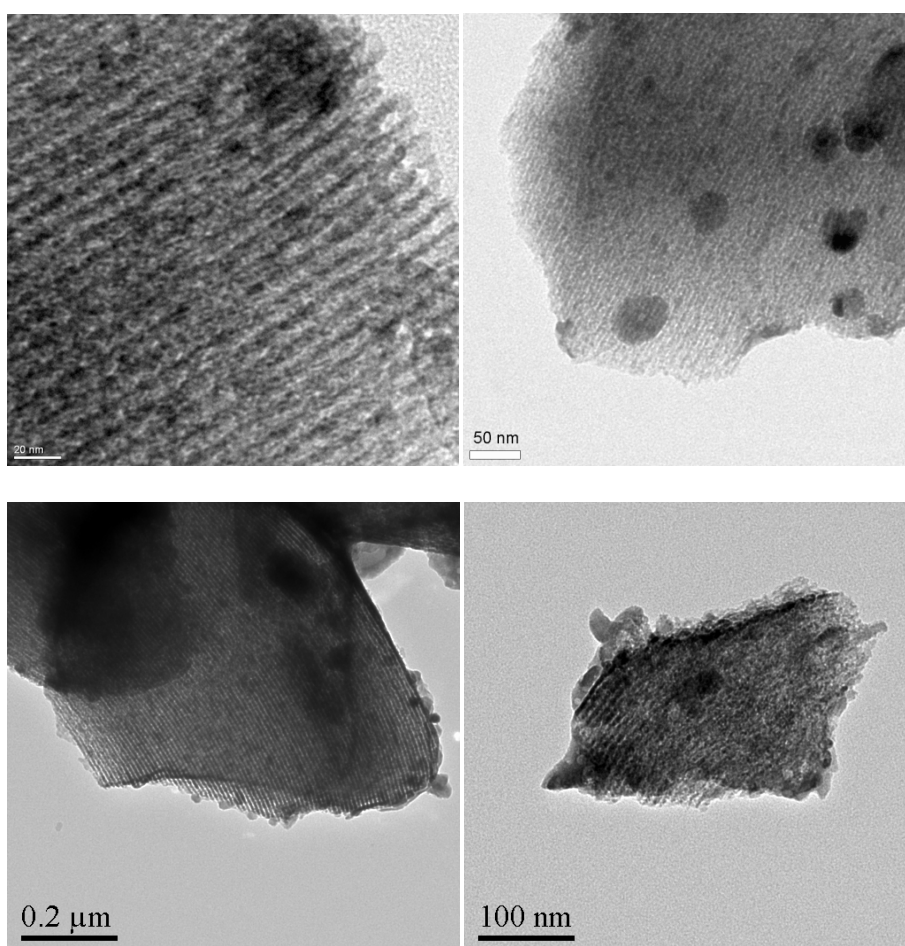

**Figure S4.** TEM images for the fresh (the upper two) and used (the bottom two) La-Cu-O/SBA-15.

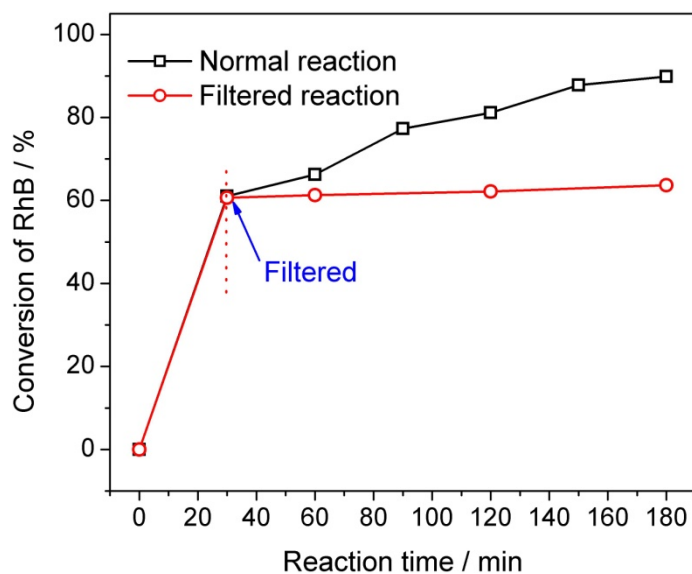

**Figure S5.** Conversion of RhB measured in the normal reaction and that in the filtered reaction. For the filtered reaction, the catalyst was filtered after reaction for 30 min.

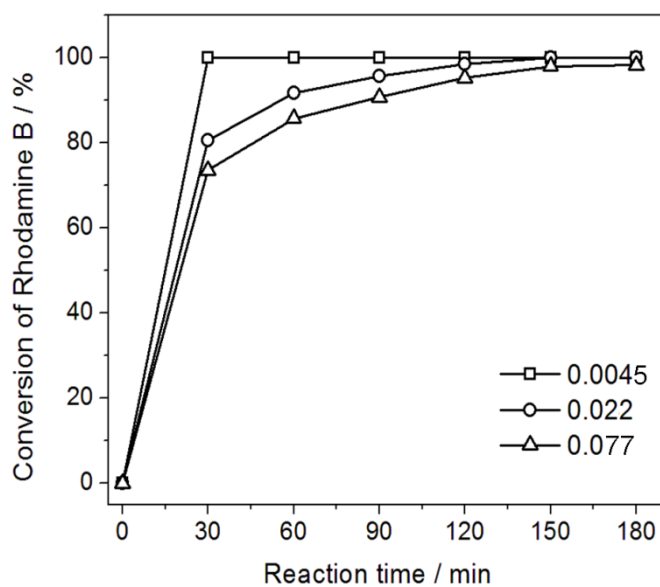

**Figure S6.** Degradation activity of La-Cu-O/SBA-15 for RhB oxidation at molar ratio of RhB to catalyst (La-Cu-O/SBA-15) equals to 0.0045, 0.022 and 0.077.

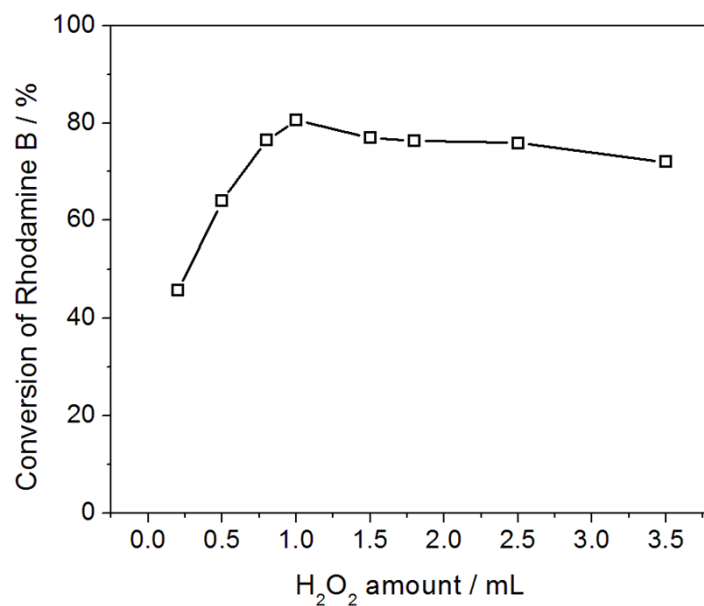

**Figure S7.** Effect of H<sub>2</sub>O<sub>2</sub> dosage on the degradation activity of La-Cu-O/SBA-15 for RhB oxidation. Data measured at reaction time of 30 min; molar ratio of RhB to catalyst (La-Cu-O/SBA-15) is 0.022.

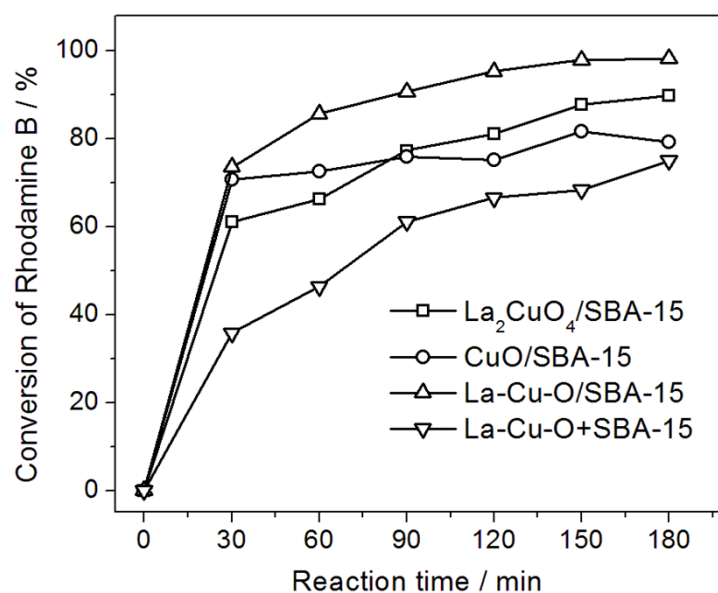

**Figure S8.** Degradation activity of La-Cu-O/SBA-15, La<sub>2</sub>CuO<sub>4</sub>/SBA-15, CuO/SBA-15 and the mixture “La-Cu-O + SBA-15” for RhB oxidation with the reaction time. Molar ratio of RhB to catalyst (La-Cu-O/SBA-15) is 0.077.



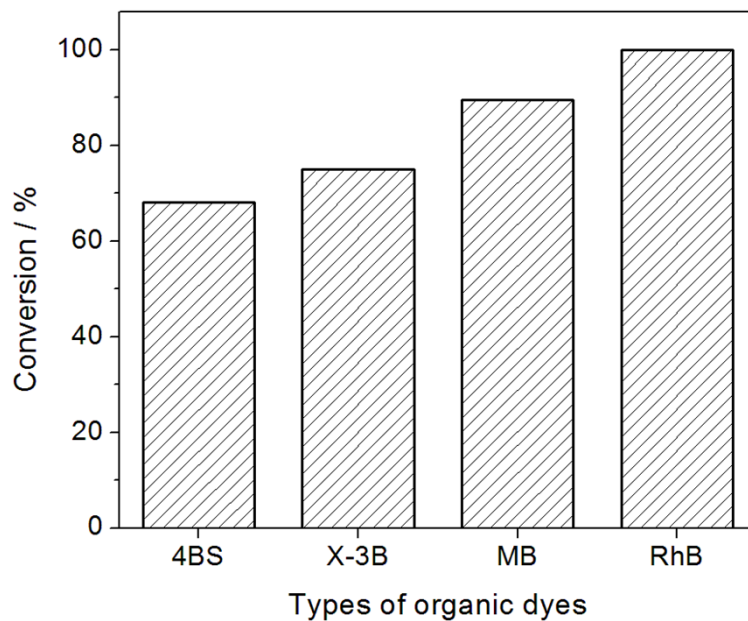

**Figure S9.** Catalytic activity of La-Cu-O/SBA-15 for various organic dyes. Reaction conditions: catalyst 0.1 g, reaction time 30 min, dyes amount 50 mL, 0.02 mmol/L.

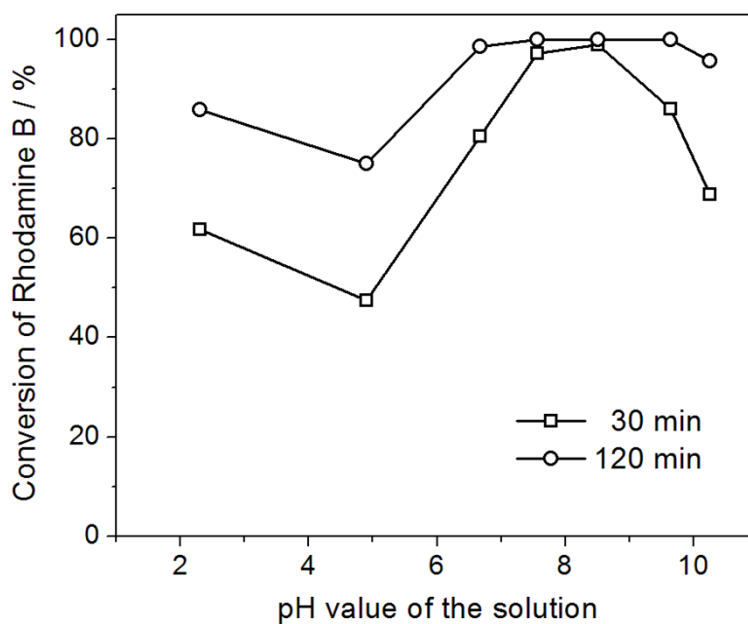

**Figure S10.** Effect of pH on the degradation activity La-Cu-O/SBA-15 for RhB oxidation, data were taken at reaction time of 30 and 120 min. Molar ratio of RhB to catalyst (La-Cu-O/SBA-15) is 0.022.

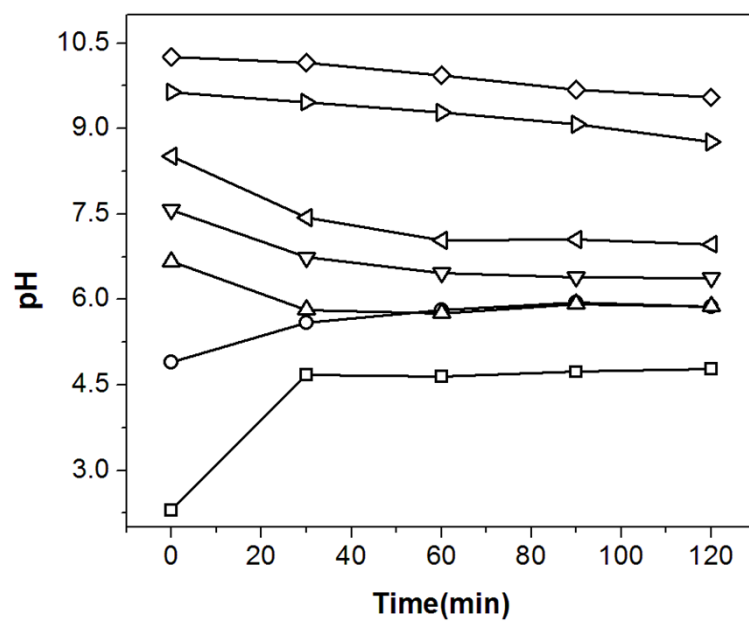

**Figure S11.** Changes of solution pH during the reaction at different initial pH. Molar ratio of RhB to catalyst (La-Cu-O/SBA-15) is 0.022.

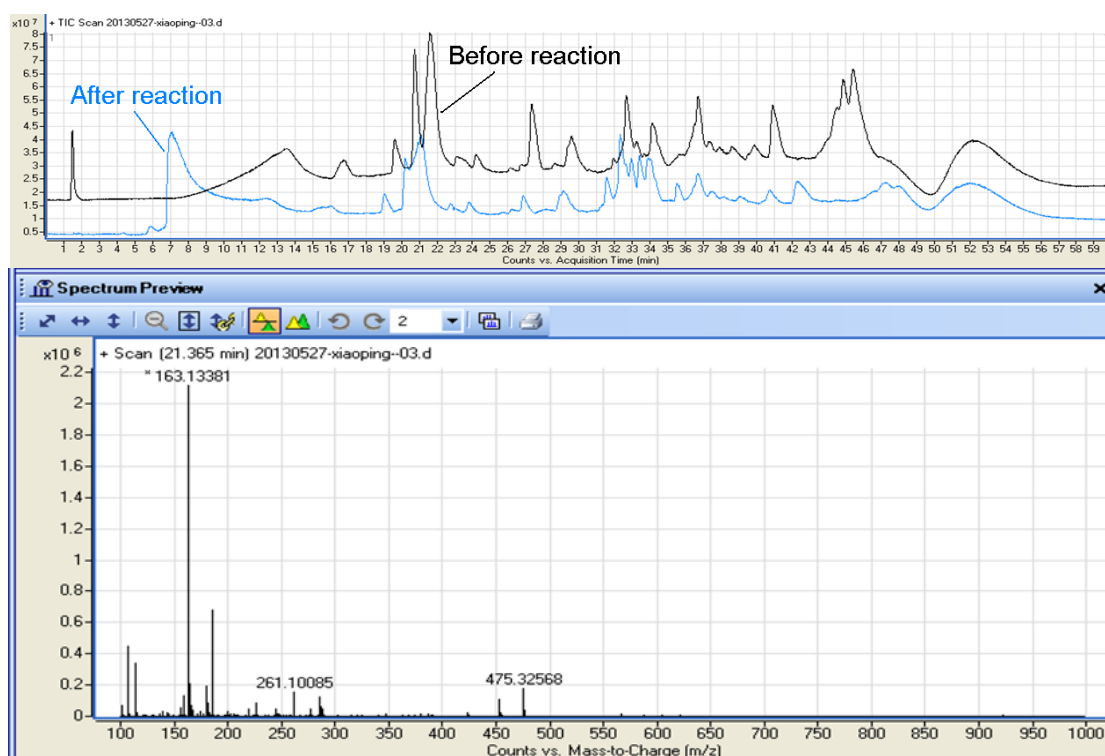

**Figure S12.** HPLC-MS analysis on the RhB solution before and after reaction for 60 min. Molar ratio of RhB to catalyst (La-Cu-O/SBA-15) is 0.077.

## References

1. (a) J. Zhu, K. Kailasam, X. Xie, R. Schomaecker and A. Thomas, *Chem. Mater.*, 2011, **23**, 2062;(b) J. Zhu, X. Xie, S. A. C. Carabineiro, P. B. Tavares, J. L. Figueiredo, R. Schomacker and A. Thomas, *Energ. Environ. Sci.*, 2011, **4**, 2020-2024.
2. J. Ding, X. Lü, H. Shu, J. Xie and H. Zhang, *Mater. Sci. Eng.*, 2010, **171**, 31.
3. W. Dong, X. Li, J. Yu, W. Guo, B. Li, L. Tan, C. Li, J. Shi and G. Wang, *Mater. Lett.*, 2012, **67**, 131.
4. X. Wang, Y. Lin, Z. C. Zhang and J. Y. Bian, *J. Sol-Gel Sci. Technol.*, 2011, **60**, 1.
5. W. Luo, L. Zhu, N. Wang, H. Tang, M. Cao and Y. She, *Environ. Sci. Technol.*, 2010, **44**, 1786.
6. L. Zhang, Y. Nie, C. Hu and J. Qu, *Appl. Catal. B: Environ.*, 2012, **125**, 418.
7. P. Xiao, J.P. Hong, T. Wang, X.L. Xu, Y.H. Yuan, J.L. Li, J.J. Zhu, *Catal. Lett.* 2013, **143**, 887.
